# Supplementary material for: Evolution of High-Value Patents in Reverse Innovation: Focus on Chinese Local Enterprises
Source: Hindawi journal article supplement (doi:10.1155/2020/8127096), 2020-11-11
Supplement: f1 [file 8127096.f1.pdf]

| 50     | 50     | 2     | 43         | 33         | 28         | Y         |
|--------|--------|-------|------------|------------|------------|-----------|
| 2587   | 2564   | 228   | 2221       | 1711       | 1522       | 2221      |
| 5852   | 5827   | 508   | 5037       | 3875       | 3443       | 5037      |
| 16667  | 16612  | 1135  | 14307      | 10993      | 9669       | 14307     |
| 18838  | 18797  | 1343  | 16191      | 12438      | 10959      | 16191     |
| 34355  | 34287  | 2242  | 29501      | 22653      | 19894      | 29501     |
| 38002  | 37960  | 2459  | 32647      | 25062      | 22001      | 32647     |
| 49417  | 49368  | 2971  | 42423      | 32557      | 28509      | 42423     |
| 57835  | 57799  | 3164  | 49615      | 38060      | 33228      | 49615     |
| 64042  | 63997  | 4081  | 55023      | 42230      | 37053      | 55023     |
| 73829  | 73793  | 4019  | 63338      | 48585      | 42409      | 63338     |
| 81116  | 81084  | 5333  | 69731      | 53519      | 47009      | 69731     |
| 75960  | 75931  | 5096  | 65314      | 50133      | 44067      | 65314     |
| 196275 | 196216 | 7870  | 167982     | 128747     | 111484     | 167982    |
| 348809 | 348747 | 11240 | 298140     | 228399     | 196894     | 298139    |
| 364444 | 364383 | 12643 | 311640     | 238773     | 206124     | 311640    |
| 415990 | 415956 | 13265 | 355563     | 272376     | 234759     | 355563    |
| 409860 | 409848 | 12826 | 350298     | 268331     | 231193     | 350298    |
|        |        |       | 314762.6   | 241119.2   | 207826.396 | 314762.6  |
|        |        |       | 296227.616 | 226916.506 | 195550.65  | 296227.62 |
|        |        |       | 274845.363 | 210536.615 | 181437.975 | 274845.36 |
|        |        |       | 254512.657 | 194958.124 | 167993.205 |           |

| X1 | X2       | X3       |          |          |          |          |          |
|----|----------|----------|----------|----------|----------|----------|----------|
|    | 43       | 33       | 28       | 1711     | 43       | 33       | 28       |
|    | 2221     | 1711     | 1522     | 3875     | 2221     | 1711     | 1522     |
|    | 5037     | 3875     | 3443     | 10993    | 5037     | 3875     | 3443     |
|    | 14307    | 10993    | 9669     | 12438    | 14307    | 10993    | 9669     |
|    | 16191    | 12438    | 10959    | 22653    | 16191    | 12438    | 10959    |
|    | 29501    | 22653    | 19894    | 25062    | 29501    | 22653    | 19894    |
|    | 32647    | 25062    | 22001    | 32557    | 32647    | 25062    | 22001    |
|    | 42423    | 32557    | 28509    | 38060    | 42423    | 32557    | 28509    |
|    | 49615    | 38060    | 33228    | 42230    | 49615    | 38060    | 33228    |
|    | 55023    | 42230    | 37053    | 48585    | 55023    | 42230    | 37053    |
|    | 63338    | 48585    | 42409    | 53519    | 63338    | 48585    | 42409    |
|    | 69731    | 53519    | 47009    | 50133    | 69731    | 53519    | 47009    |
|    | 65314    | 50132    | 44067    | 128747   | 65314    | 50132    | 44067    |
|    | 167982   | 128747   | 111483   | 228399   | 167982   | 128747   | 111483   |
|    | 298139   | 228399   | 196893   | 238773   | 298139   | 228399   | 196893   |
|    | 311640   | 238772   | 206124   | 272376   | 311640   | 238772   | 206124   |
|    | 355563   | 272376   | 234759   | 268331   | 355563   | 272376   | 234759   |
|    | 350298.3 | 268330.5 | 231192.9 | 241119.2 | 350298.3 | 268330.5 | 231192.9 |
|    | 314762.6 | 241119.2 | 207826.4 | 226916.5 | 314762.6 | 241119.2 | 207826.4 |
|    | 296227.6 | 226916.5 | 195550.6 | 210536.6 | 296227.6 | 226916.5 | 195550.6 |
|    | 274845.4 | 210536.6 | 181438   |          |          |          |          |
|    | 254512.7 | 194958.1 | 167993.2 |          |          |          |          |

|            |          |          |          |
|------------|----------|----------|----------|
| 1522       | 43       | 33       | 28       |
| 3443.45    | 2221     | 1711     | 1522     |
| 9669.35    | 5037     | 3875     | 3443     |
| 10959.1    | 14307    | 10993    | 9669     |
| 19893.95   | 16191    | 12438    | 10959    |
| 22001.35   | 29501    | 22653    | 19894    |
| 28508.95   | 32647    | 25062    | 22001    |
| 33227.65   | 42423    | 32557    | 28509    |
| 37052.8    | 49615    | 38060    | 33228    |
| 42409.1    | 55023    | 42230    | 37053    |
| 47008.85   | 63338    | 48585    | 42409    |
| 44066.85   | 69731    | 53519    | 47009    |
| 111483.9   | 65314    | 50132    | 44067    |
| 196893.65  | 167982   | 128747   | 111483   |
| 206124.4   | 298139   | 228399   | 196893   |
| 234758.65  | 311640   | 238772   | 206124   |
| 231192.9   | 355563   | 272376   | 234759   |
| 207826.396 | 350298.3 | 268330.5 | 231192.9 |
| 195550.65  | 314762.6 | 241119.2 | 207826.4 |
| 181437.975 | 296227.6 | 226916.5 | 195550.6 |

|          |          |          |
|----------|----------|----------|
| 43       | 33       | 28       |
| 2221     | 1711     | 1522     |
| 5037     | 3875     | 3443     |
| 14307    | 10993    | 9669     |
| 16191    | 12438    | 10959    |
| 29501    | 22653    | 19894    |
| 32647    | 25062    | 22001    |
| 42423    | 32557    | 28509    |
| 49615    | 38060    | 33228    |
| 55023    | 42230    | 37053    |
| 63338    | 48585    | 42409    |
| 69731    | 53519    | 47009    |
| 65314    | 50132    | 44067    |
| 167982   | 128747   | 111483   |
| 298139   | 228399   | 196893   |
| 311640   | 238772   | 206124   |
| 355563   | 272376   | 234759   |
| 350298.3 | 268330.5 | 231192.9 |
| 314762.6 | 241119.2 | 207826.4 |
| 296227.6 | 226916.5 | 195550.6 |
| 274845.4 | 210536.6 | 181438   |
| 254512.7 | 194958.1 | 167993.2 |
| 232886.9 | 178389.6 | 153701.4 |
| 210905.9 | 161548.9 | 141457.4 |
| 189026.9 | 144786.6 | 127070.9 |
| 16792.12 | 12835.23 | 13097.26 |
| 8829.391 | 6747.363 | 6977.764 |
| 5795.919 | 4428.35  | 4629.013 |
| 4225.159 | 3227.644 | 3405.358 |
